# Supplementary material for: Implicit and explicit: a scoping review exploring the contribution of anthropological practice in implementation science
Source: Springer Nature journal article supplement (doi:10.1186/s13012-024-01344-0), 2024-02-12
Supplement: MOESM2 [file 26725904]

## Ethnography in Implementation Science Abstract Screening Inclusion Rubric

## Second Round Screening

**Citation, Title, and Abstract Screening**

1. Is the article in English?
  - a. Yes: Include
  - b. No: Exclude
2. Is the article original research?
  - a) Yes or unclear: investigate further, continue screening
  - b) No: exclude **and mark in the Label box “Not original research”**
3. Is the article about a health-focused intervention?
  1. Yes or unclear: investigate further, continue screening
  2. No: exclude **and mark in the Label box “Not health-focused intervention”**
4. Is it an abstract, or protocol, methods, review, or policy paper?
  1. No or unclear: investigate further, continue screening
  2. Yes: exclude **and mark in the Label box “Abstract”, “Protocol Paper”, “Methods Paper”, “Review” or “Protocol Paper” as appropriate**
5. Is it operationally “ethnographic” (“anthropology” or “ethnography” specifically mentioned OR some combination of: multiple methods (NOT including unrelated 1 QUAL + 1 QUANT), theoretical/methodological, field notes, observation, triangulation, ethnography, immersion crystallization, site visits, comparative study, multiple perspectives, in situ, iterative, longitudinal, participatory, reflexivity)?
  1. Yes or unclear: investigate further, continue screening
  2. No: exclude **and mark in the Label box “Not ethnographic”**

6. Is it operationally “implementation science” (“implementation science/research” or “knowledge translation” specifically mentioned OR some combination of an IS theory/model/framework, stage of implementation (preparation, implementation, etc.), implementation outcomes, potentially facilitator/barriers with something else)?

1. Yes or unclear: investigate further, continue screening
2. No: exclude **and mark in the Label box “Not IS”**

7. Is there another reason it shouldn't be included?

1. No or unclear: investigate further, continue screening
2. Yes: exclude **and mark in the Label box “Other” and add brief reason for exclusion in the Note box**

8. If title/abstract passes all of the above, **include for full review**
